# Supplementary material for: Nickel–vanadium monolayer double hydroxide for efficient electrochemical water oxidation
Source: PubMed Central journal article supplement (PMC4912661; doi:10.1038/ncomms11981), 2016-06-16
Supplement: ncomms11981-s1.pdf [file ncomms11981-s1.pdf]

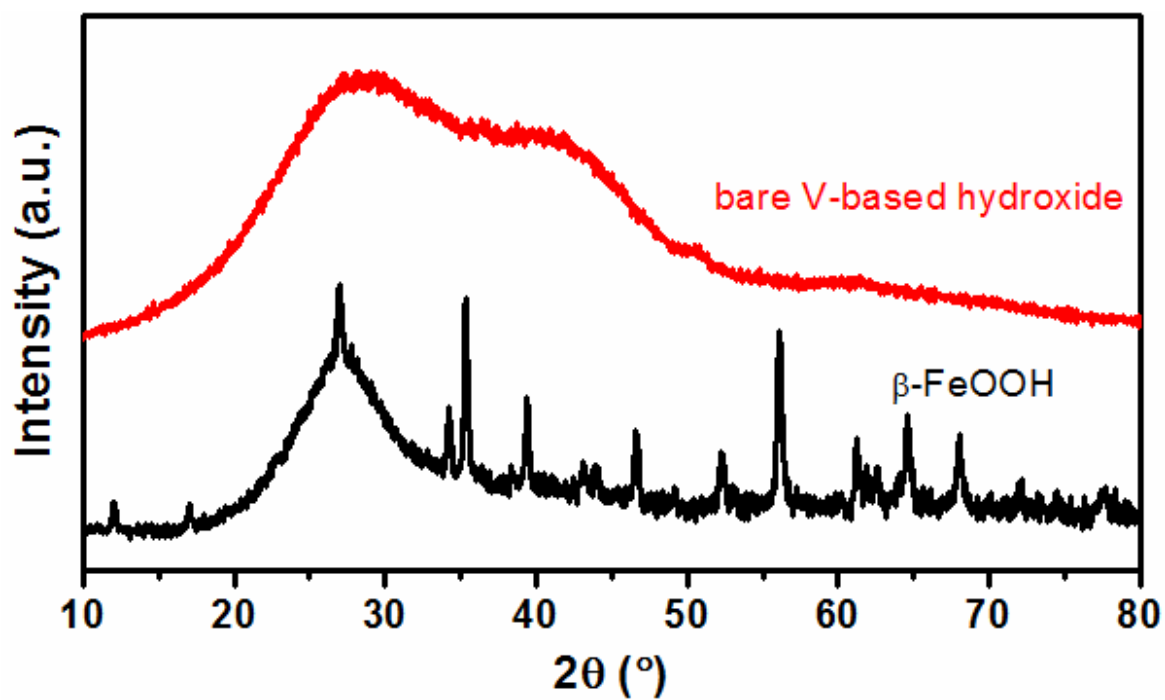

**Supplementary Figure 1 | XRD pattern of as-synthesized bare V-based hydroxide and bare Fe-based hydroxide.** The bare V-based hydroxide shows very low crystallinity and the XRD of bare Fe-based hydroxide indicates it is  $\beta$ -FeOOH.

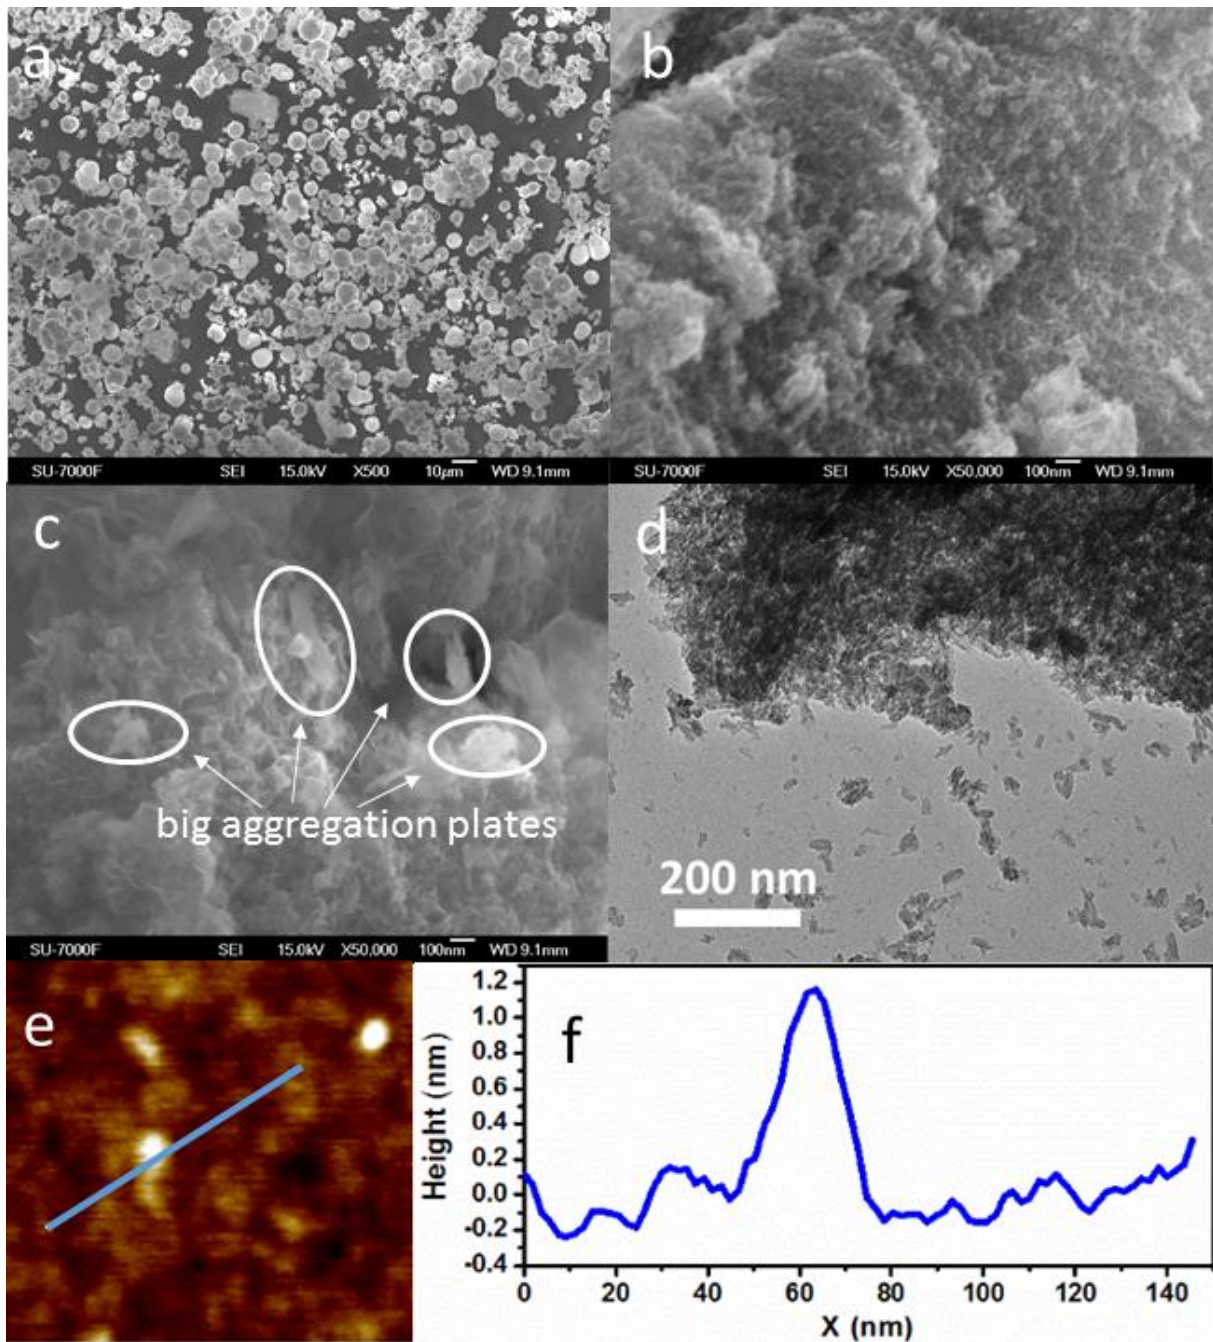

**Supplementary Figure 2 | SEM, TEM and AFM of LDHs.** (a) SEM images of as-synthesized pure  $\alpha$ -Ni(OH)<sub>2</sub> spheres, (b) Ni<sub>0.75</sub>V<sub>0.25</sub>-LDH and (c) Ni<sub>0.75</sub>Fe<sub>0.25</sub>-LDH; (d) TEM (e) AFM and (f) height profile of Ni<sub>0.75</sub>Fe<sub>0.25</sub>-LDH.

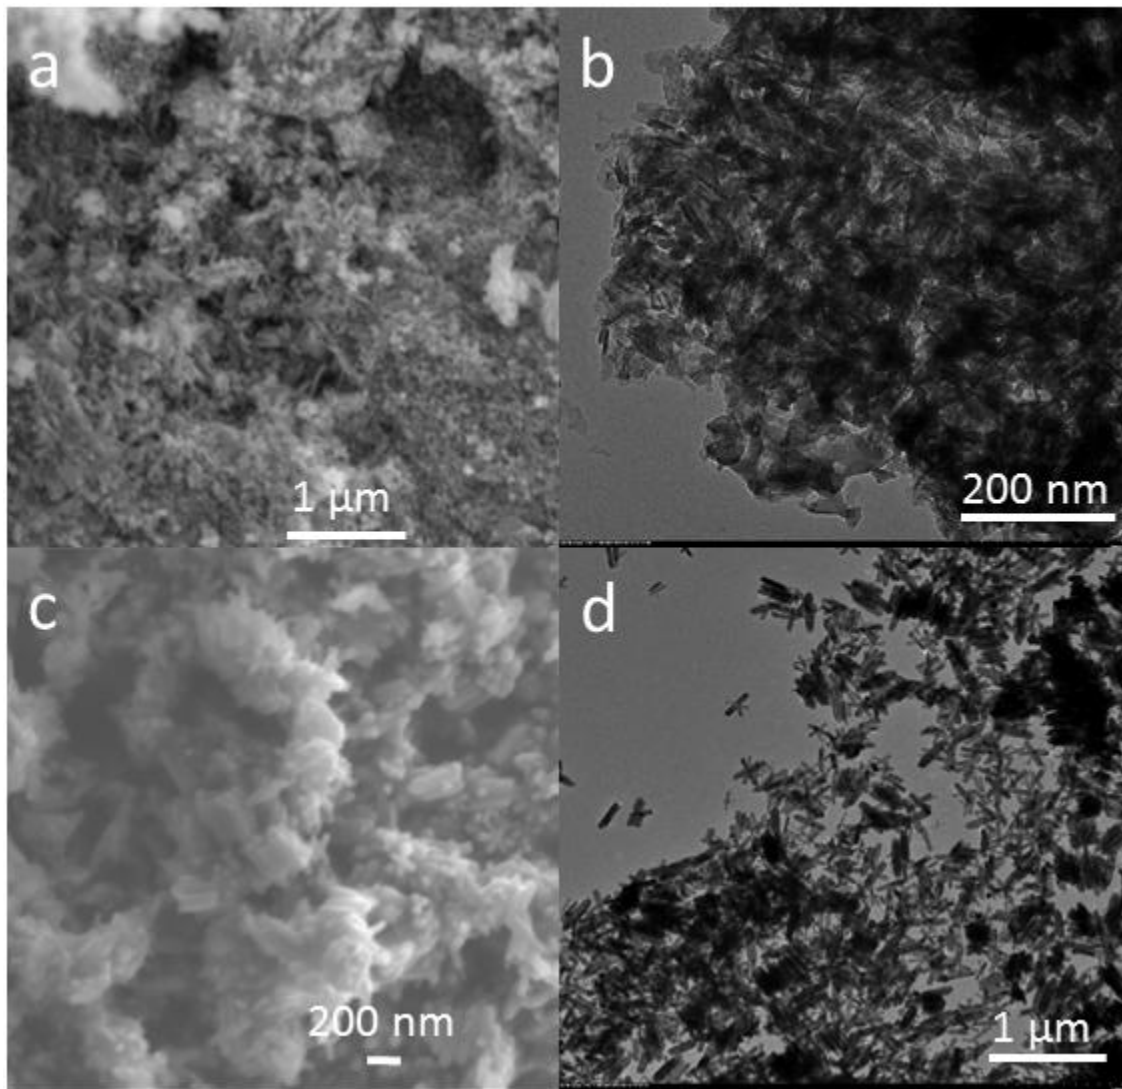

**Supplementary Figure 3 | SEM and TEM of V- and Fe-based hydroxides.** (a) SEM and (b) TEM images of as-synthesized bare V-based hydroxide; (c) SEM and (d) TEM images of bare Fe-based hydroxide ( $\beta$ -FeOOH).

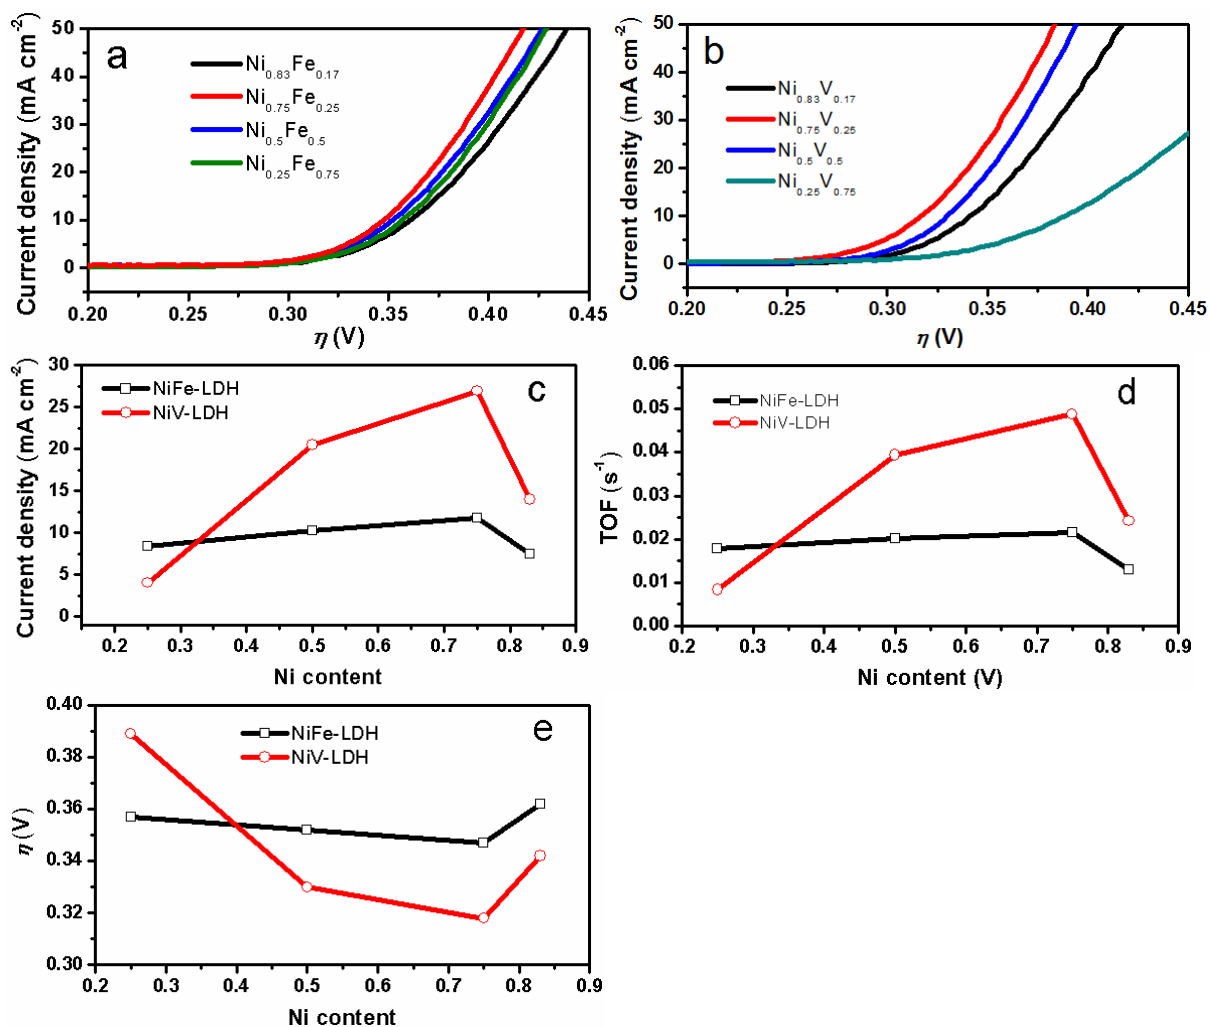

**Supplementary Figure 4 | Catalytic properties of LDHs.** (a) LSV curves of NiFe-LDHs and (b) NiV-LDHs with different Ni contents; (c) Current density and (d) TOF at 350 mV overpotential of NiFe-LDHs and NiV-LDHs with different Ni contents; (e) Overpotential required for 10 mA cm<sup>-2</sup> current density of NiFe-LDHs and NiV-LDHs with different Ni contents. All the data were collected without ohmic-drop correction.

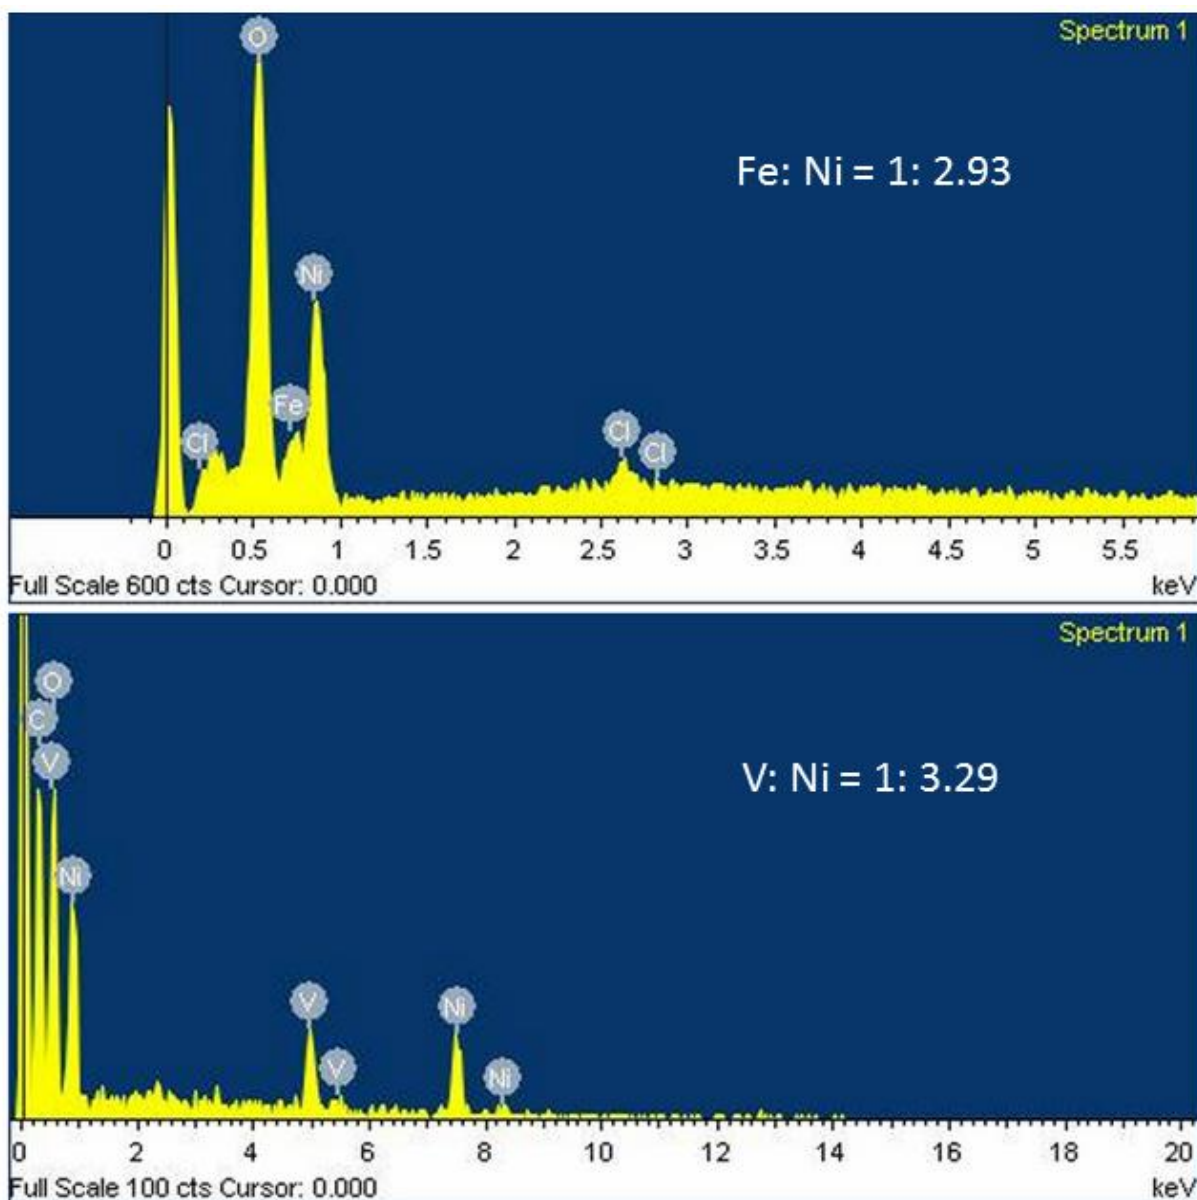

**Supplementary Figure 5 | EDS.** (upper) EDS of Ni<sub>0.75</sub>Fe<sub>0.25</sub>-LDH; (bottom) EDS of Ni<sub>0.75</sub>V<sub>0.25</sub>-LDH.

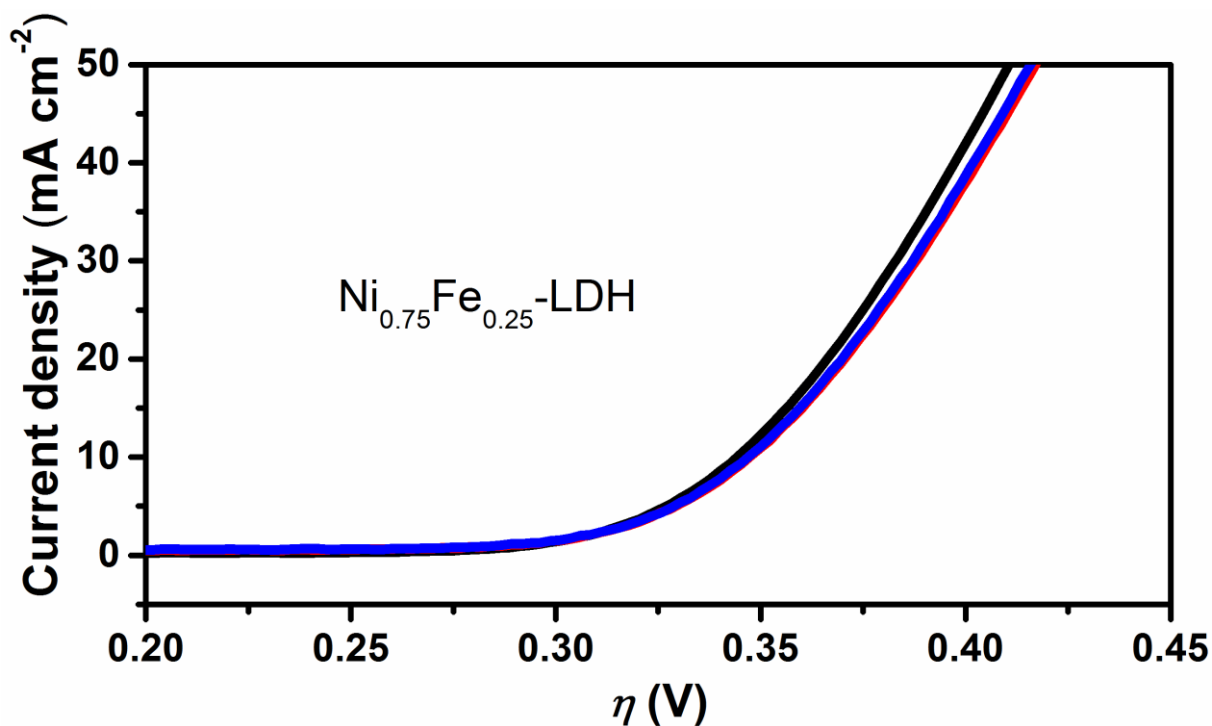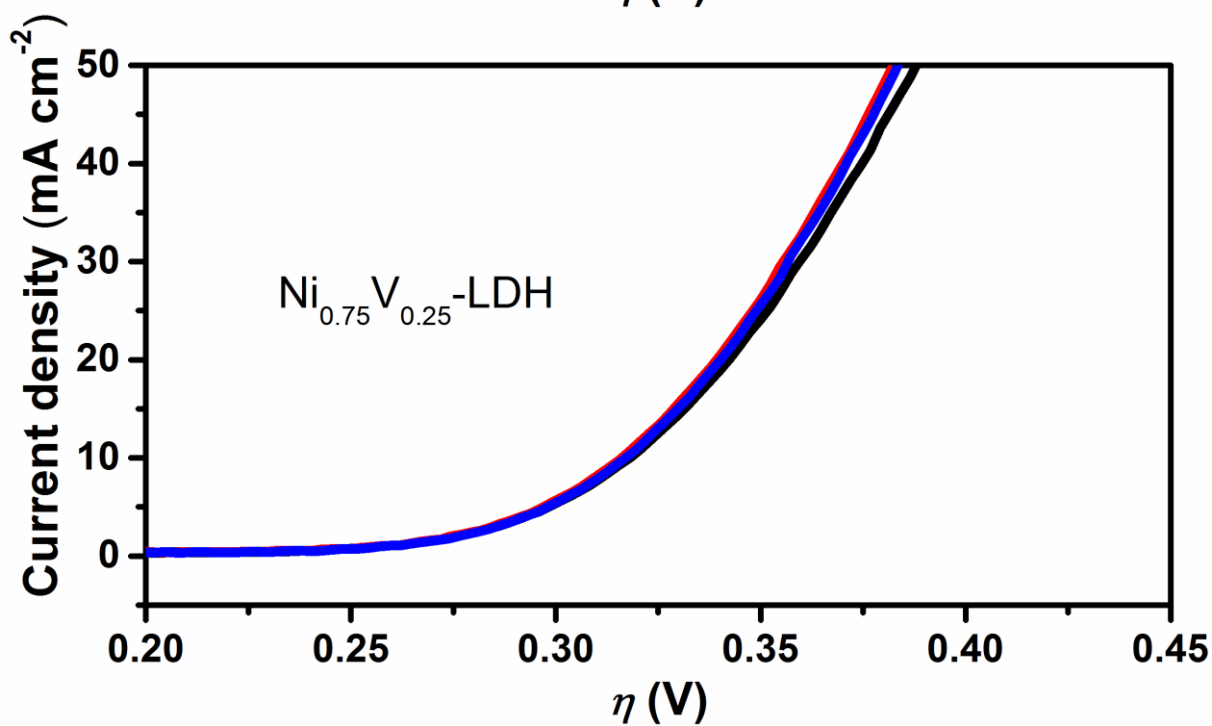

**Supplementary Figure 6 | Reproducibility of water oxidation of LDH catalysts. (upper)** Reproducibility of Ni<sub>0.75</sub>Fe<sub>0.25</sub>-LDH; **(bottom)** Reproducibility of Ni<sub>0.75</sub>V<sub>0.25</sub>-LDH. Every experiment was repeated 3 times.

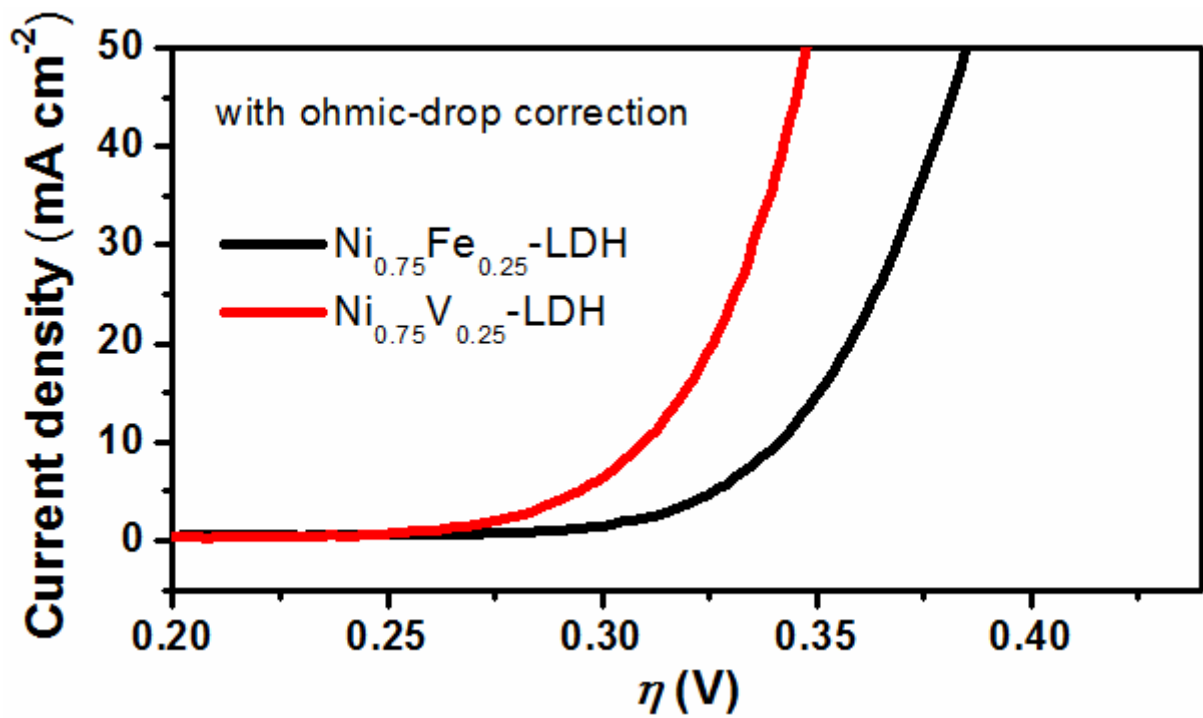

Supplementary Figure 7 | LSV curves with ohmic-drop correction of Ni<sub>0.75</sub>Fe<sub>0.25</sub>-LDH and Ni<sub>0.75</sub>V<sub>0.25</sub>-LDH. The resistance used here is around 10  $\Omega$ .

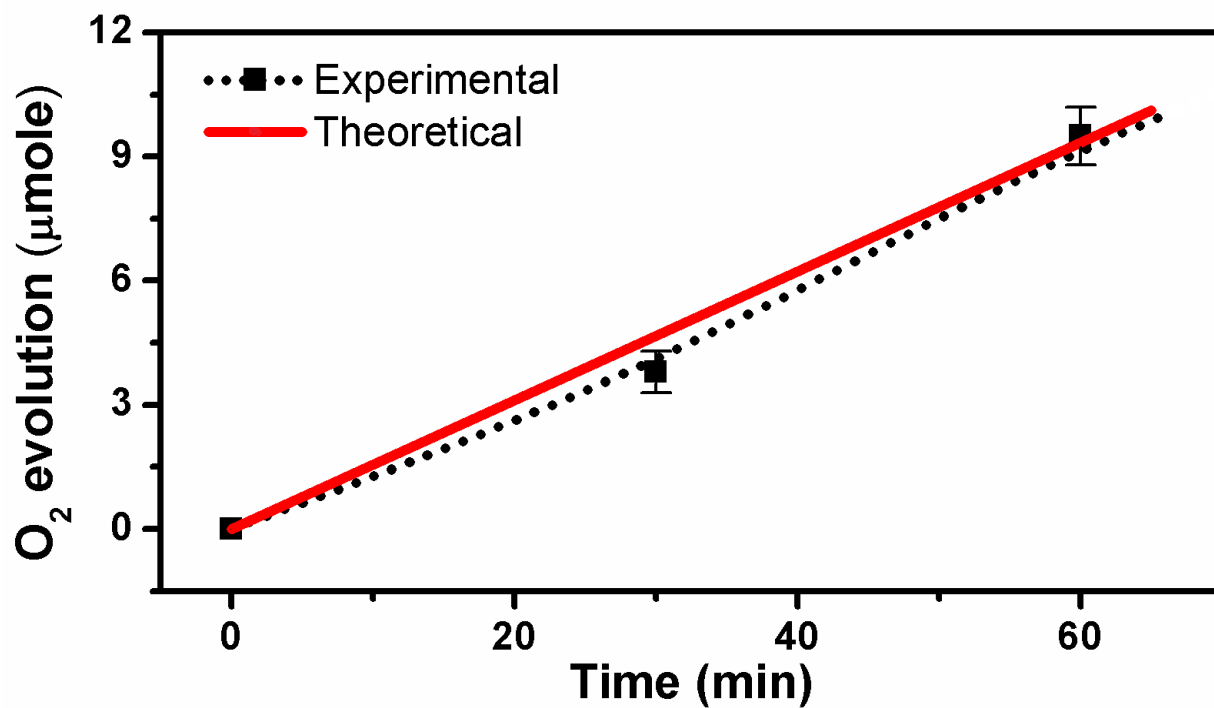

**Supplementary Figure 8 | O<sub>2</sub> evolution.** The experimental and theoretical O<sub>2</sub> evolution amount by Ni<sub>0.75</sub>V<sub>0.25</sub>-LDH at a constant oxidative current of 1 mA. All the error bars represent the standard deviations of three replicate measurements.



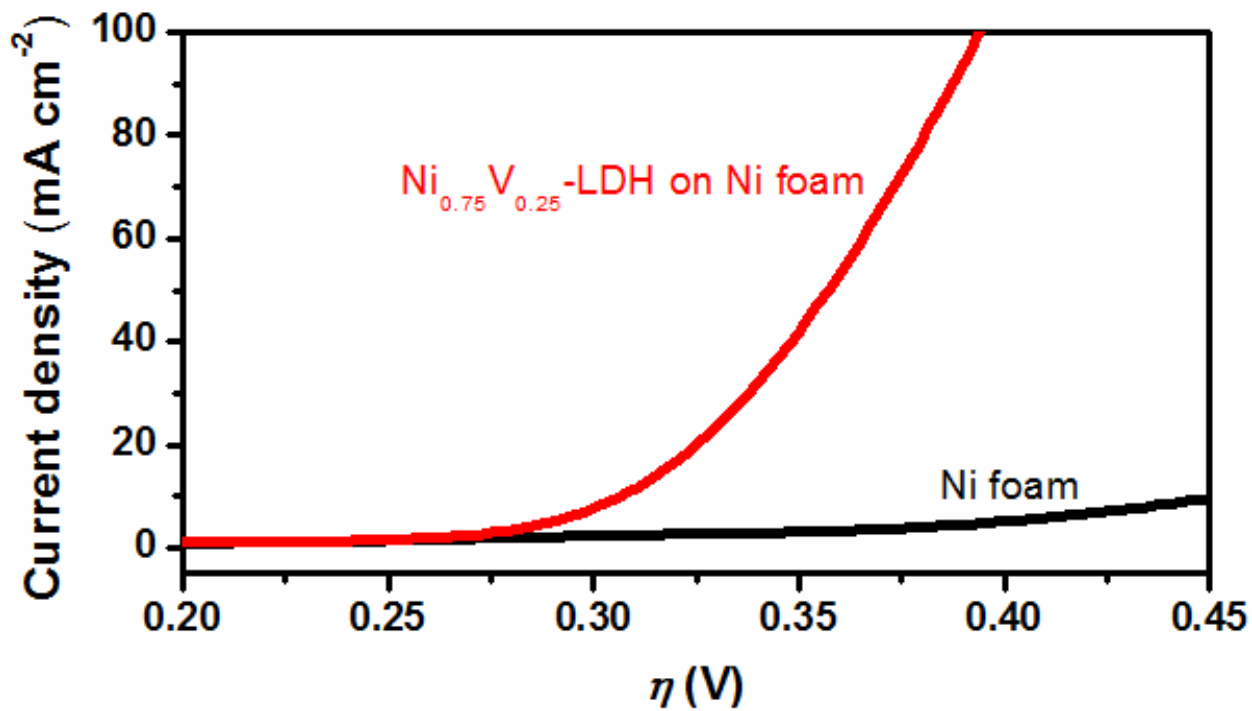

Supplementary Figure 9 | LSV curves of bare Ni foam and Ni<sub>0.75</sub>V<sub>0.25</sub>-LDH on Ni foam.

The catalyst loading amount is 0.25 mg cm<sup>-2</sup>.

**Supplementary Table 1 | Comparison of LDH catalysts for water oxidation.** All the LDHs were loaded on GC electrode unless noted otherwise.

| LDH catalysts loaded on glassy carbon | Electrolyte | Current density (mA cm <sup>-2</sup> ) at $\eta=350$ mV | Mass activity (A g <sup>-1</sup> ) at $\eta=350$ mV | References |
|---------------------------------------|-------------|---------------------------------------------------------|-----------------------------------------------------|------------|
| NiV                                   | 1 M KOH     | ~ 27                                                    | ~ 190                                               | This work  |
| NiV*                                  | 1 M KOH     | ~ 57                                                    | ~ 400                                               | This work  |
| NiFe*                                 | 1 M KOH     | ~ 11                                                    | ~ 154                                               | 1          |
| NiFe* (exfoliated)                    | 1 M KOH     | ~ 17                                                    | ~ 68                                                | 2          |
| NiFe*                                 | 1 M KOH     | ~ 17                                                    | ~ 85                                                | 3          |
| NiFe*                                 | 0.1 M KOH   | ~ 10 ( $\eta=300$ mV)                                   | -                                                   | 4          |
| NiCo*                                 | 1 M KOH     | ~ 3.2                                                   | ~ 44.8                                              | 1          |
| NiCo double hydroxide nanocage*       | 1 M KOH     | ~ 10                                                    | ~ 49                                                | 5          |
| NiCo (exfoliated) <sup>a</sup>        | 1 M KOH     | ~ 5.8                                                   | -                                                   | 6          |
| ZnCo nanosheet                        | 0.1 M KOH   | ~ 1.3                                                   | -                                                   | 7          |
| ZnCo nanoparticle                     | 0.1 M KOH   | ~ 0                                                     | ~ 0                                                 | 7          |
| ZnCo                                  | 0.1 M KOH   | <1                                                      | <3.5                                                | 8          |
| ZnCo <sup>b</sup>                     | 0.1 M KOH   | ~ 0                                                     | ~ 0                                                 | 9          |
| CoCo*                                 | 1 M KOH     | ~ 2.2                                                   | ~ 30.8                                              | 1          |
| CoCo* (exfoliated)                    | 1 M KOH     | ~ 11                                                    | ~ 154                                               | 1          |
| CoMn*                                 | 1 M KOH     | ~ 43                                                    | ~ 301                                               | 10         |
| IrO <sub>2</sub> *                    | 1 M KOH     | ~ 16                                                    | ~ 112                                               | 10         |

\* Ohmic-drop correction, <sup>a</sup> loaded on carbon paper, <sup>b</sup> loaded on Ni foil

## Supplementary references

1. Song, F. & Hu, X. Exfoliation of layered double hydroxides for enhanced oxygen evolution catalysis. *Nat. Commun.* **5**, 4477 (2014).
2. Ma, W. et al. A Superlattice of Alternately Stacked Ni–Fe Hydroxide Nanosheets and Graphene for Efficient Splitting of Water. *ACS Nano* **9**, 1977-1984 (2015).
3. Gong, M. et al. An Advanced Ni–Fe Layered Double Hydroxide Electrocatalyst for Water Oxidation. *J. Am. Chem. Soc.* **135**, 8452-8455 (2013).
4. Louie, M.W. & Bell, A.T. An Investigation of Thin-Film Ni–Fe Oxide Catalysts for the Electrochemical Evolution of Oxygen. *J. Am. Chem. Soc.* **135**, 12329-12337 (2013).
5. Nai, J. et al. Efficient Electrocatalytic Water Oxidation by Using Amorphous Ni-Co Double Hydroxides Nanocages. *Adv. Energy. Mater.* **5**, doi: 0.1002/aenm.201401880 (2015).
6. Liang, H. et al. Hydrothermal Continuous Flow Synthesis and Exfoliation of NiCo Layered Double Hydroxide Nanosheets for Enhanced Oxygen Evolution Catalysis. *Nano Lett.* **15**, 1421-1427 (2015).
7. Qiao, C. et al. One-step synthesis of zinc–cobalt layered double hydroxide (Zn–Co-LDH) nanosheets for high-efficiency oxygen evolution reaction. *J. Mater. Chem. A* **3**, 6878-6883 (2015).
8. Zou, X., Goswami, A. & Asefa, T. Efficient Noble Metal-Free (Electro)Catalysis of Water and Alcohol Oxidations by Zinc–Cobalt Layered Double Hydroxide. *J. Am. Chem. Soc.* **135**, 17242-17245 (2013).
9. Li, Y., Zhang, L., Xiang, X., Yan, D. & Li, F. Engineering of ZnCo-layered double hydroxide nanowalls toward high-efficiency electrochemical water oxidation. *J. Mater. Chem. A* **2**, 13250-13258 (2014).

10. Song, F. & Hu, X. Ultrathin Cobalt–Manganese Layered Double Hydroxide Is an Efficient Oxygen Evolution Catalyst. *J. Am. Chem. Soc.* **136**, 16481-16484 (2014).
